# Supplementary material
Source: Copernicus journal article supplement (doi:10.5194/amt-19-3427-2026)
Supplement: Supplementary file [file amt-19-3427-2026-supplement-title-page.pdf › amt-19-3427-2026-supplement-title-page.pdf]

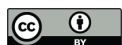

## *Supplement of*

# **A methodological framework for evaluating real-time bioaerosol classification algorithms**

**Marie-Pierre Meurville et al.**

*Correspondence to:* Marie-Pierre Meurville (marie-pierre.meurville@meteoswiss.ch),  
Gian-Duri Lieberherr (gian.lieberherr@meteoswiss.ch), and Benoît Crouzy (benoit.crouzy@meteoswiss.ch)

- amt-19-3427-2026-supplement-title-page.pdf
- Supp
  - S01.csv
  - S02.csv
  - S03.csv
  - S04.csv
  - S05.csv
  - S06.csv
  - S07.csv

The copyright of individual parts of the supplement might differ from the article licence.
